# Supplementary material
Source: PubMed Central journal article supplement (PMC6775964)
Supplement: 41396_2019_414_MOESM23_ESM.pdf [file 41396_2019_414_MOESM23_ESM.pdf]

LOCUS pCM80\_PxoxF 7656 bp ds-DNA circular  
 01-SEP-2017  
 DEFINITION Cloning vector pCM80, complete sequence.  
 ACCESSION AF327716  
 VERSION AF327716.1  
 KEYWORDS .  
 SOURCE Cloning vector pCM80  
 ORGANISM Cloning vector pCM80 other sequences; artificial  
 sequences;  
 vectors.  
 REFERENCE 1 (bases 1 to 7245)  
 AUTHORS Marx,C.J. and Lidstrom,M.E.  
 TITLE Development of improved versatile broad-host-range vectors  
 for use  
 in methylotrophs and other Gram-negative bacteria  
 JOURNAL Microbiology 147 (Pt 8), 2065-2075 (2001)  
 PUBMED 11495985  
 REFERENCE 2 (bases 1 to 7245)  
 AUTHORS Marx,C.J. and Lidstrom,M.E.  
 TITLE Direct Submission  
 JOURNAL Submitted (12-DEC-2000) Microbiology, University of  
 Washington, Box  
 357242, Seattle, WA 98195, USA  
 COMMENT  
 COMMENT  
 COMMENT ApEinfo:methylated:0  
 FEATURES Location/Qualifiers  
 source 2864..7656  
 /organism="Cloning vector pCM80"  
 /mol\_type="other DNA"  
 /db\_xref="taxon:163915"  
 /note="for use in Methylobacterium extorquens  
 AM1; the  
 HindIII-BamHI fragment of pCM27 (pCR2.1 with a  
 PCR  
 fragment encompassing PmxAF) was cloned into  
 pCM62, the  
 HindIII site was blunted, and a 64 bp synthetic  
 linker was  
 inserted to reinstate the lacZa (and multiple  
 cloning  
 site)"  
 /label=for use in Methylobacterium extorquens  
 AM1; the  
 HindIII-BamHI fragment of pCM27 (pCR2.1 with a  
 PCR f  
 /ApEinfo\_fwdcolor="pink"  
 /ApEinfo\_revcolor="pink"  
 /ApEinfo\_graphicformat="arrow\_data {{0 1 2 0 0  
 -1} {} 0}

```

width 5 offset 0"
source 1..2452
/organism="Cloning vector pCM80"
/mol_type="other DNA"
/db_xref="taxon:163915"
/note="for use in Methylobacterium extorquens
AM1; the
PCR HindIII-BamHI fragment of pCM27 (pCR2.1 with a
fragment encompassing PmxAF) was cloned into
pCM62, the HindIII site was blunted, and a 64 bp synthetic
linker was inserted to reinstate the lacZa (and multiple
cloning site)"
/label=for use in Methylobacterium extorquens
AM1; the
PCR f(1) HindIII-BamHI fragment of pCM27 (pCR2.1 with a
extorquens /ApEinfo_label="for use in Methylobacterium
with a AM1; the HindIII-BamHI fragment of pCM27 (pCR2.1
PCR f"
/ApEinfo_fwdcolor="pink"
/ApEinfo_revcolor="pink"
/ApEinfo_graphicformat="arrow_data {{0 1 2 0 0
-1} {} 0}
width 5 offset 0"
rep_origin 4..712
/note="oriV; IncP origin of replication"
/label=oriV; IncP origin of replication
/ApEinfo_fwdcolor="#8d8bff"
/ApEinfo_revcolor="#8d8bff"
/ApEinfo_graphicformat="arrow_data {{}} {} 1}
width 5
rep_origin offset 0"
1180..1735
/note="colE1"
/label=colE1
/ApEinfo_fwdcolor="#8d8bff"
/ApEinfo_revcolor="#8d8bff"
/ApEinfo_graphicformat="arrow_data {{}} {} 1}
width 5
promoter offset 0"
2017..2072
/regulatory_class="promoter"
/note="Plac; lac operon promoter/operator"
/label=Plac; lac operon promoter/operator

```

```

/ApEinfo_fwdcolor="#f00cff"
/ApEinfo_revcolor="#f00cff"
/ApEinfo_graphicformat="arrow_data {{0 1 2 0 0
-1} {} 1}
    promoter
    2118..2435
    /regulatory_class="promoter"
    /note="PmxαF; Methylobacterium extorquens mxa
operon
    promoter"
    /label=PmxαF; Methylobacterium extorquens mxa
operon
    promoter
/ApEinfo_fwdcolor="#f00cff"
/ApEinfo_revcolor="#f00cff"
/ApEinfo_graphicformat="arrow_data {{0 1 2 0 0
-1} {} 1}
    gene
    2869..3192
    /gene="lacZα"
    /label=lacZα
    /ApEinfo_fwdcolor="#10ff3d"
    /ApEinfo_revcolor="#10ff3d"
    /ApEinfo_graphicformat="arrow_data {{0 1 2 0 0
-1} {} 0}
    misc_feature
    2786..2802
    /label=T7_transl_en_RBS
    /ApEinfo_fwdcolor="#19fff6"
    /ApEinfo_revcolor="#19fff6"
    /ApEinfo_graphicformat="arrow_data {{0 1 2 0 0
-1} {} 0}
    CDS
    2869..3192
    /gene="lacZα"
    /note="beta-galactosidase alpha peptide"
    /codon_start=1
    /transl_table=11
    /product="LacZ"
    /protein_id="AAK73405.1"
    /
translation="MTMITPSLHACRSTLEDPRVPSSNSLAVVLQRRDWENPGVTQLN
RLAAHPPFASWRNSEEARTDRPSQQLRSLNGEWRLMRYFLLTHLCGISHRIWCTLSTI
CSDAA"
    /label=LacZ
    /ApEinfo_fwdcolor="#0bce3f"
    /ApEinfo_revcolor="#0bce3f"
    /ApEinfo_graphicformat="arrow_data {{0 1 2 0 0
-1} {} 1}

```

```
gene width 5 offset 0"
      complement(3380..4045)
      /gene="tetR"
      /label=tetR
      /ApEinfo_fwdcolor="#10ff3d"
      /ApEinfo_revcolor="#10ff3d"
      /ApEinfo_graphicformat="arrow_data {{0 1 2 0 0
-1} {} 0}
```

```
CDS width 5 offset 0"
     complement(3380..4045)
     /gene="tetR"
     /function="tetracycline resistance regulation"
     /codon_start=1
     /transl_table=11
     /product="TetR"
     /protein_id="AAK73406.1"
     /
translation="MTKLQPNTVIRAALDLLNEVGVDGLTTRKLAERLGVQPALYWH
FRNKRALLDALAEAMLAENHTHSVPRADDDWRSFLIGNARSFRQALLAYRDGARIHAG
TRPGAPQMETADAQLRFLCEAGFSAGDAVNALMTISYFTVGAVLEEQAGDSDAGERGG
TVEQAPLSPLLRAAIDAFDEAGPDAAFEQGLAVIVDGLAKRRLVVRNVEGPRKGAKKP
LLS"
     /label=TetR
     /ApEinfo_fwdcolor="#0bce3f"
     /ApEinfo_revcolor="#0bce3f"
     /ApEinfo_graphicformat="arrow_data {{0 1 2 0 0
-1} {} 1}
```

```
gene width 5 offset 0"
     4151..5350
     /gene="tetA"
     /label=tetA
     /ApEinfo_fwdcolor="#10ff3d"
     /ApEinfo_revcolor="#10ff3d"
     /ApEinfo_graphicformat="arrow_data {{0 1 2 0 0
-1} {} 0}
```

```
CDS width 5 offset 0"
     4151..5350
     /gene="tetA"
     /function="tetracycline resistance"
     /codon_start=1
     /transl_table=11
     /product="TetA"
     /protein_id="AAK73407.1"
     /
translation="MKPNIPLIVILSTVALDAVGIGLIMPVLPGLLRDLVHSNDVTAH
YGILLALYALVQFACAPVLGALSDRFGRRPILLVSLAGATVDYAIMATAPFLWVLYIG
```

RIVAGITGATGAVAGAYIADITDGDERRARHFGFMSACFGFGMVAGPVLGGLMGGFSPH  
APFFAAAALNGLNFLTGCFLLPESHKGERRPLRREALNPLASFRWARGMTVVAALMAV  
FFIMQLVGQVPAALWVIFGEDRFHWDATTIGISLAAFGILHSLAQAMITGPVAARLGE  
RRALMLGMIADGTGYILLAFASTRGWMAFPIMVLLASGGIGMPALQAMLSRQVDEERQG  
QLQGS�AALTSLSIVGPLLFTAIYAASITTWNGWAWIAGAALYLLCLPALRRGLWSG  
AGQRADR"  
/label=TetA  
/ApEinfo\_fwdcolor="#0bce3f"  
/ApEinfo\_revcolor="#0bce3f"  
/ApEinfo\_graphicformat="arrow\_data {{0 1 2 0 0  
-1} {} 1}  
misc\_binding width 5 offset 0"  
2837..2860  
/label=His-tag  
/ApEinfo\_fwdcolor="#037aff"  
/ApEinfo\_revcolor="#037aff"  
/ApEinfo\_graphicformat="arrow\_data {{}} {} 1}  
width 5  
gene offset 0"  
complement(5581..6729)  
/gene="trfA"  
/label=trfA  
/ApEinfo\_fwdcolor="#10ff3d"  
/ApEinfo\_revcolor="#10ff3d"  
/ApEinfo\_graphicformat="arrow\_data {{0 1 2 0 0  
-1} {} 0}  
CDS width 5 offset 0"  
complement(5581..6729)  
/gene="trfA"  
/function="trans-acting replication"  
/codon\_start=1  
/transl\_table=11  
/product="TrfA"  
/protein\_id="AAK73408.1"  
/  
translation="MNRTFDRKAYRQELIDAGFSAEDAETIASRTVMRAPRETFQSVG  
SMVQQATAKIERDSVQLAPPALPAPSAEVERSRRLQEAAGLAKSMTIDTRGTMTTKK  
RKTAGEDLAKQVSEAKQAALLKHTKQQIKEMQLSLFDIAPWPDTRAMPNDTARSALF  
TTRNKKIPREALQNKVIHFVNKDKITYTGVELRADDDELWQQVLEYAKRTPIGEPI  
TFTFYELCQDLGWSINGRYYTKAEELSRQLQATAMGFTSDRVGHLESVLLHRFRVLD

```

RGKKT SRCQVLIDEEIVVLFAGDH YTKFIWEKYRKL SPTARRMFDYFSSHREPYPLKL
ETFR L MCGSDSTRVKKWREQVGEACEELRG SGLVEHAWVNDDL VHCKR"
/label=TrfA
/ApEinfo_fwdcolor="#0bce3f"
/ApEinfo_revcolor="#0bce3f"
/ApEinfo_graphicformat="arrow_data {{0 1 2 0 0
-1} {} 1}
width 5 offset 0"
oriT 6911..7649
/note="IncP origin of transfer"
/label=IncP origin of transfer
/ApEinfo_fwdcolor="#0e3dff"
/ApEinfo_revcolor="#0e3dff"
/ApEinfo_graphicformat="arrow_data {{0 1 2 0 0
-1} {} 0}
width 5 offset 0"
gene complement(7256..7372)
/label=traJ'
/ApEinfo_fwdcolor="#10ff3d"
/ApEinfo_revcolor="#10ff3d"
/ApEinfo_graphicformat="arrow_data {{0 1 2 0 0
-1} {} 0}
width 5 offset 0"
CDS complement(7256..7372)
/label=traJ'
/note="truncated oriT-recognizing protein"
/codon_start=1
/transl_table=11
/product="TraJ'"
/protein_id="AAK73409.1"
/
translation="MADETKPTRKGSPPIKVYCLPDERRAIEEKAAAAGMSL"
/label=TraJ'
/ApEinfo_fwdcolor="#0bce3f"
/ApEinfo_revcolor="#0bce3f"
/ApEinfo_graphicformat="arrow_data {{0 1 2 0 0
-1} {} 1}
width 5 offset 0"
protein_bind 2813..2836
/label=TEV
/ApEinfo_fwdcolor="#ffa32a"
/ApEinfo_revcolor="#ffa32a"
/ApEinfo_graphicformat="arrow_data {{}} {} 1}
width 5
promoter 2457..2768
/label=PxoxF, xoxF promoter
/ApEinfo_fwdcolor="#f00cff"
/ApEinfo_revcolor="#f00cff"

```

```

-1} {} 1}                               /ApEinfo_graphicformat="arrow_data {{0 1 2 0 0
width 5 offset 0"
      exon                               2810..2812
                                          /label=start codon
                                          /ApEinfo_fwdcolor="#ff193e"
                                          /ApEinfo_revcolor="#ff193e"
-1} {} 1}                               /ApEinfo_graphicformat="arrow_data {{0 1 2 0 0
width 5 offset 0"
ORIGIN
      1 gaccctttcc gacgctcacc gggctggttg ccctcgccgc tgggctggcg
gccgtctatg
      61 gccctgcaaa cgcgccagaa acgccgtcga agccgtgtgc gagacaccgc
ggccgcccggc
      121 gttgtggata cctcgcgga aacttgccc tctactgacag atgagggggc
gacgttgaca
      181 cttgaggggc cgactcacc ggcgcggcgt tgacagatga ggggcaggct
cgatttcggc
      241 cggcgacgtg gagctggcca gcctcgcaaa tcggcgaaaa cgctgattt
tacgcgagtt
      301 tcccacagat gatgtggaca agcctgggga taagtgcctt gcggtattga
cacttgaggg
      361 gcgcgactac tgacagatga ggggcgcgat ccttgacact tgaggggcag
agtgtctgaca
      421 gatgaggggc gcacctattg acatttgagg ggctgtccac aggcagaaaa
tccagcattt
      481 gcaaggggtt ccgcccgtt ttcggccacc gctaacctgt cttttaacct
gcttttaaac
      541 caatatttat aaaccttggt tttaaccagg gctgcgccct gtgcgcgtga
ccgcgcacgc
      601 cgaagggggg tgccccctt tctcgaacc tccggccccg ctaacgcggg
cctcccatcc
      661 ccccaggggc tgcgcccctc ggccgcgaac ggccctcacc caaaaatggc
agccaagctg
      721 accacttctg cgctcggccc ttccggctgg ctggtttatt gctgataaat
ctggagccgg
      781 tgagcgtggg tctcgcggtg tcattgcagc actggggcca gatggtaagc
cctcccgtat
      841 cgtagttatc tacacgacgg ggagtcaggc aactatggat gaacgaaata
gacagatcgc
      901 tgagataggt gcctcactga ttaagcattg gtaactgtca gaccaagttt
actcatatat
      961 actttagatt gatttaaaac ttcattttta atttaaaagg atctaggtga
agatcctttt
      1021 tgataatctc atgaccaaaa tcccttaacg tgagttttcg ttccactgag
cgtcagaccc
      1081 cgtagaaaag atcaaaggat cttcttgaga tccttttttt ctgcgcgtaa
tctgctgctt
      1141 gcaaacaaaa aaaccaccgc taccagcggg ggtttgtttg ccggatcaag

```

agctaccaac  
1201 tctttttccg aaggtaactg gcttcagcag agcgcagata ccaaatactg  
tccttctagt  
1261 gtagccgtag ttaggccacc acttcaagaa ctctgtagca ccgcctacat  
acctcgcctt  
1321 gctaatacctg ttaccagtgg ctgctgccag tggcgataag tcgtgtctta  
ccgggttga  
1381 ctcaagacga tagttaccgg ataaggcgca gcggtcgggc tgaacggggg  
gttcgtgcac  
1441 acagcccagc ttggagcgaa cgacctacac cgaactgaga tacctacagc  
gtgagctatg  
1501 agaaagcgcc acgcttcccg aaggagaaaa ggcggacagg tatccggtaa  
gcggcagggg  
1561 cggaacagga gagcgcacga gggagcttcc agggggaac gcctggtatc  
tttatagtcc  
1621 tgtcggggtt cgccacctct gacttgagcg tcgatttttg tgatgctcgt  
cagggggg  
1681 gagcctatgg aaaaacgcca gcaacgcggc ctttttacgg ttcctggcct  
tttgctggc  
1741 ttttgctcac atgttctttc ctgcttattc ccctgattct gtggataacc  
gtattaccgc  
1801 ctttgagtga gctgataccg ctgccgcag ccgaacgacc gagcgcagcg  
agtcagtga  
1861 cgaggaagcg gaagagcgcc caatacgcaa accgcctctc cccgcgcggt  
ggccgattca  
1921 ttaatgcagc tggcacgaca ggtttcccga ctggaaagcg ggcagtgagc  
gcaacgcaat  
1981 taatgtgagt tagctcactc attaggcacc ccaggcttta cactttatgc  
ttccggctcg  
2041 tatgttggtg ggaattgtga gcggataaca atttcacaca ggaaacagct  
atgaccatga  
2101 ttacgccaag ctagcttccc gcttggtcgg gccgcttcgc gagggcccgt  
tgacgacaac  
2161 ggtgcatggt gtcccggccc cggcgaagac gatgccaata cgttgcgaca  
ctacgccttg  
2221 gcacttttag aattgcctta tcgtcctgat aagaaatgtc cgaccagcta  
aagacatcgc  
2281 gtccaatcaa agcctagaaa atataggcga agggacgcta ataagtcttt  
cataagaccg  
2341 cgcaaatcta aaaatatcct tagattcacg atgcggcact tcggatgact  
tccgagcgag  
2401 cctggaacct cagaaaaacg tctgagagat accgcggatc tcacacagga  
aatttcGCAA  
2461 CGCAAATGC TGAATTTAGC AGGCAAGTTT CCTGATAAAG GGCCCTGTGA  
GTGCGACATT  
2521 CGACGCGCGA AAGCGAGTTG ACGGCGCCCG AAATTTTCTT AGAGTTCGTT  
CAAGCTTCGG  
2581 TTTCCGGGAG CCGCTAAGGG ATGCGGACCC AGCCGGGTAA GTCGCCGGGA  
ACTATGGAAT  
2641 AATCCTAATT TCTGTGCGGC AGGCGCGAGC TGCCGGAGCG AATATCATCC



CTGTGCGAAA

2701 CAGCAGGTCA ATCAACGGTG GGTAGCGGGC TGCTATCCAG CGGCGGATAA  
GACTTGTCCG  
2761 AGGAATCCtc tagaaataat tttgtttaac tttaagaagg agatatacca  
tggccgaaaa  
2821 cctctatfff cagggacatc atcaccatca ccatcaccac tgacagctat  
gaccatgatt  
2881 acgccaagct tgcattgctg caggtcgtact ctagaggatc cccgggtacc  
gagctcgaat  
2941 tcaactggccg tcgtttttaca acgtcgtgac tgggaaaacc ctggcgttac  
ccaacttaat  
3001 cgccttgacg cacatcccc tttcgccagc tggcgttaata gcgaagaggc  
ccgcaccgat  
3061 cgcccttccc aacagttgag cagcctgaat ggcgaatggc gcctgatgag  
gtatfffctc  
3121 cttacgcatc tgtgaggtat ttcacaccgc atatggtgca ctctcagtac  
aatctgctct  
3181 gatgccgatc agttaagcca gccccgacac ccgccaacac ccgctgacgc  
gccctgacgg  
3241 gcttgtctgc tcccggcatc cgcttacaga caagctgtga ccgtctccgg  
gagctgcatg  
3301 tgtcagaggt tttcaccgac atcaccgaaa cgcgagagac gaaagggcct  
cgtgatagc  
3361 ctatfffatc aggttaatgt catgataata atggtttctt agcacccttt  
ctcggctcct  
3421 caacgttccct gacaacgagc ctctttttcg ccaatccatc gacaatcacc  
gagagtcctc  
3481 gctcgaacgc tgcgtccgga ccggcttctg cgaaggcgtc tatcgcggcc  
cgcaacagcg  
3541 gcgagagcgg agcctgttca acggtgccgc cgcgctcgcc ggcattcgtg  
tcgcccgcct  
3601 gctcctcaag cacggcccca acagtgaagt agctgattgt catcagcgc  
ttgacggcgt  
3661 ccccgccgga aaaaccgccc tcgcagagga agcgaagctg cgcgtcggcc  
gtttccatct  
3721 gcggtgagcc cggctcagctg ccggcatgga tgcgagcgc atcgcggtag  
gagagcagc  
3781 cctgcctgaa gctgcgggca ttcccgatca gaaatgagc ccagtcgtc  
tcggctctc  
3841 gcaccgaatg cgtatgattc tccgccagca tggcttcggc cagtcgtc  
agcagcgc  
3901 gcttgttccct gaagtgccag taaagcggc gctgctgaac cccaaccgt  
tccgccagtt  
3961 tgcgtgctgt cagaccgtct acgcccacct cgttcaacag gtccagggc  
gcacggatca  
4021 ctgtattcgg ctgcaacttt gtcattgattg acactttatc actgataaac  
ataatattc  
4081 caccaactta tcagtgataa agaatccgag cgttcaatc gaccagcgg  
ggctggtccg  
4141 gaggccagac gtgaaacca acataccct gatcgttaatt ctgagcactg

tcgcgctcga  
4201 cgctgtcggc atcggcctga ttatgccggt gctgccgggc ctcctgcgcg  
atctggttca  
4261 ctggaacgac gtcaccgccc actatggcat tctgctggcg ctgtatgctg  
tggtgcaatt  
4321 tgcctgcgca cctgtgctgg gcgcgctgtc ggatcgtttc gggcggcggc  
caatcttgct  
4381 cgtctcgtg gccggcgcca ctgtcgacta cgccatcatg gcgacagcgc  
ctttcctttg  
4441 ggttctctat atcgggcgga tcgtggccgg catcaccggg gcgactgggg  
cggtagccgg  
4501 cgcttatatt gccgatatca ctgatggcga tgagcgcgcg cggcacttcg  
gcttcatgag  
4561 cgcctgtttc gggttcggga tggtcgcggg acctgtgctc ggtgggctga  
tgggcggttt  
4621 ctccccccac gctccgttct tcgccgcggc agccttgaac ggcctcaatt  
tcctgacggg  
4681 ctgtttcctt ttgccggagt cgcacaaagg cgaacgccgg ccggtacgcc  
gggaggctct  
4741 caaccgctc gcttcgttcc ggtgggcccg gggcatgacc gtcgtcgccg  
ccctgatggc  
4801 ggtcttcttc atcatgcaac ttgtcggaca ggtgccggcc gcgctttggg  
tcattttcgg  
4861 cgaggatcgc tttcactggg acgcgaccac gatcggcatt tcgcttgccg  
catttgcat  
4921 tctgcattca ctcgcccagg caatgatcac cggccctgta gccgcccggc  
tcggcgaaaag  
4981 gcgggcactc atgctcggaa tgattgccga cggcacaggc tacatcctgc  
ttgccttcgc  
5041 gacacgggga tggatggcgt tcccgatcat ggtcctgctt gcttcgggtg  
gcatcggaat  
5101 gccggcgctg caagcaatgt tgtccaggca ggtggatgag gaacgtcagg  
ggcagctgca  
5161 aggctcactg gcggcgctca ccagcctgac ctcgatcgtc ggaccctcc  
tcttcacggc  
5221 gatctatgcg gcttctataa caacgtggaa cgggtgggca tggattgcag  
gcgctgccct  
5281 ctacttgctc tgcctgccgg cgctgcgtcg cgggctttgg agcggcgag  
ggcaacgagc  
5341 cgatcgctga tcgtggaac gataggccta tgccatgcgg gtcaaggcga  
cttccggcaa  
5401 gctatacgcg ccctagaatt gtcaatttta atcctctggt tatcggcagt  
tcgtagagcg  
5461 cgccgtgctg cccgagcgat actgagcgaa gcaagtgcgt cgagcagtg  
ccgcttggtc  
5521 ctgaaatgcc agtaaagcgc tggctgctga acccccagcc ggaactgacc  
ccacaaggcc  
5581 ctagcgtttg caatgcacca ggtcatcatt gaccaggcg tgttccacca  
ggccgctgcc  
5641 tcgcaactct tcgcaggctt cgccgacctg ctcgcgccac ttcttcacgc

gggtggaatc  
5701 cgatccgcac atgaggcgga aggtttccag cttgagcggg tacggctccc  
ggtgcgagct  
5761 gaaatagtcg aacatccgtc gggccgtcgg cgacagcttg cgg tacttct  
cccatatgaa  
5821 tttcgtgtag tggtcgccag caaacagcac gacgatttcc tcgtcgatca  
ggacctggca  
5881 acgggacggt ttcttgccac ggtccaggac gcggaagcgg tgcagcagcg  
acaccgattc  
5941 caggtgcca acgcggtcgg acgtgaagcc catcgccgtc gcctgtaggc  
gcgacaggca  
6001 ttcctcggcc ttcgtgtaat accggccatt gatcgaccag cccaggtcct  
ggcaaagctc  
6061 gtagaacgtg aaggtgatcg gctcgccgat aggggtgcmc ttcgcgtact  
ccaacacctg  
6121 ctgccacacc agttcgtcat cgtcggcccg cagctcgacg ccggtgtagg  
tgatcttcac  
6181 gtccttggtg acgtggaaaa tgacctggt ttgcagcgc tcgcgcggga  
ttttcttggt  
6241 gcgctggtg aacagggcag agcgggccgt gtcgtttggc atcgctcgca  
tcgtgtccgg  
6301 ccacggcgca atatcgaaca aggaaagctg catttccttg atctgctgct  
tcgtgtggtt  
6361 cagcaacgcg gcctgcttg cctcgtgac ctgttttgcc aggtcctcgc  
cggcgggttt  
6421 tcgcttcttg gtcgtcatag ttcctcgcgt gtcgatggtc atcgacttcg  
ccaaacctgc  
6481 cgcctcctgt tcgagacgac gcgaacgctc cacggcggcc gatggcgcgg  
gcagggcagg  
6541 gggagccagt tgcacgctgt cgcgctcgat cttggccgta gcttgctgga  
ccatcgagcc  
6601 gacggactgg aaggtttcgc ggggcgcacg catgacggtg cggcttgca  
tggtttcggc  
6661 atcctcggcg gaaaaccccg cgtcgatcag ttcttgctg tatgccttcc  
ggtcaaactg  
6721 ccgattcatt caccctcctt gcgggattgc cccgactcac gccggggcaa  
tgtgccctta  
6781 ttcctgattt gaccgcctg gtgccttgggt gtccagataa tccaccttat  
cggcaatgaa  
6841 gtcggtcccg tagaccgtct ggccgtcctt ctgctacttg gtattccgaa  
tcttgccctg  
6901 cacgaatacc agtccgcga agtcgctctt cttgatggag cgcattggga  
cgtgcttggc  
6961 aatcacgcgc accccccggc cgttttagcg gctaaaaaag tcatggctct  
gccctcgggc  
7021 ggaccacgcc catcatgacc ttgccaagct cgtcctgctt ctcttcgatc  
ttcgccagca  
7081 gggcgaggat cgtggcatca ccgaaccgcg ccgtgcgcgg gtcgtcgggtg  
agccagagtt  
7141 tcagcaggcc gccagggcg cccaggtcgc cattgatgcg ggccagctcg

cggacgtgct  
7201 catagtccac gacgcccgtg atttttagc cctggccgac ggccagcagg  
taggcctaca  
7261 ggctcatgcc ggccgccgcc gccttttct caatcgctct tcgttcgtct  
ggaaggcagt  
7321 acaccttgat aggtgggctg cccttcctgg ttggcttggt ttcacagcc  
atccgcttgc  
7381 cctcatctgt tacgccggcg gtagccggcc agcctcgag agcaggattc  
ccgttgagca  
7441 ccgccagggtg cgaataaggg acagtgaaga agaacaccc gctcgcggt  
gggcctactt  
7501 cacctatcct gcccggtga cgccgttga tacaccaagg aaagtctaca  
cgaacccttt  
7561 ggcaaatcc tgtatatcgt gcgaaaagg atggatatac cgaaaaatc  
gctataatga  
7621 ccccgaagca gggttatgca gcgaaaaga tccgtc  
//
